# Supplementary material for: Prediction of Muscle Energy States at Low Metabolic Rates Requires Feedback Control of Mitochondrial Respiratory Chain Activity by Inorganic Phosphate
Source: PubMed Central journal article supplement (PMC3314597; doi:10.1371/journal.pone.0034118), 2012-03-28
Supplement: pone.0034118.s001.pdf [file pone.0034118.s001.pdf]

Figure S1

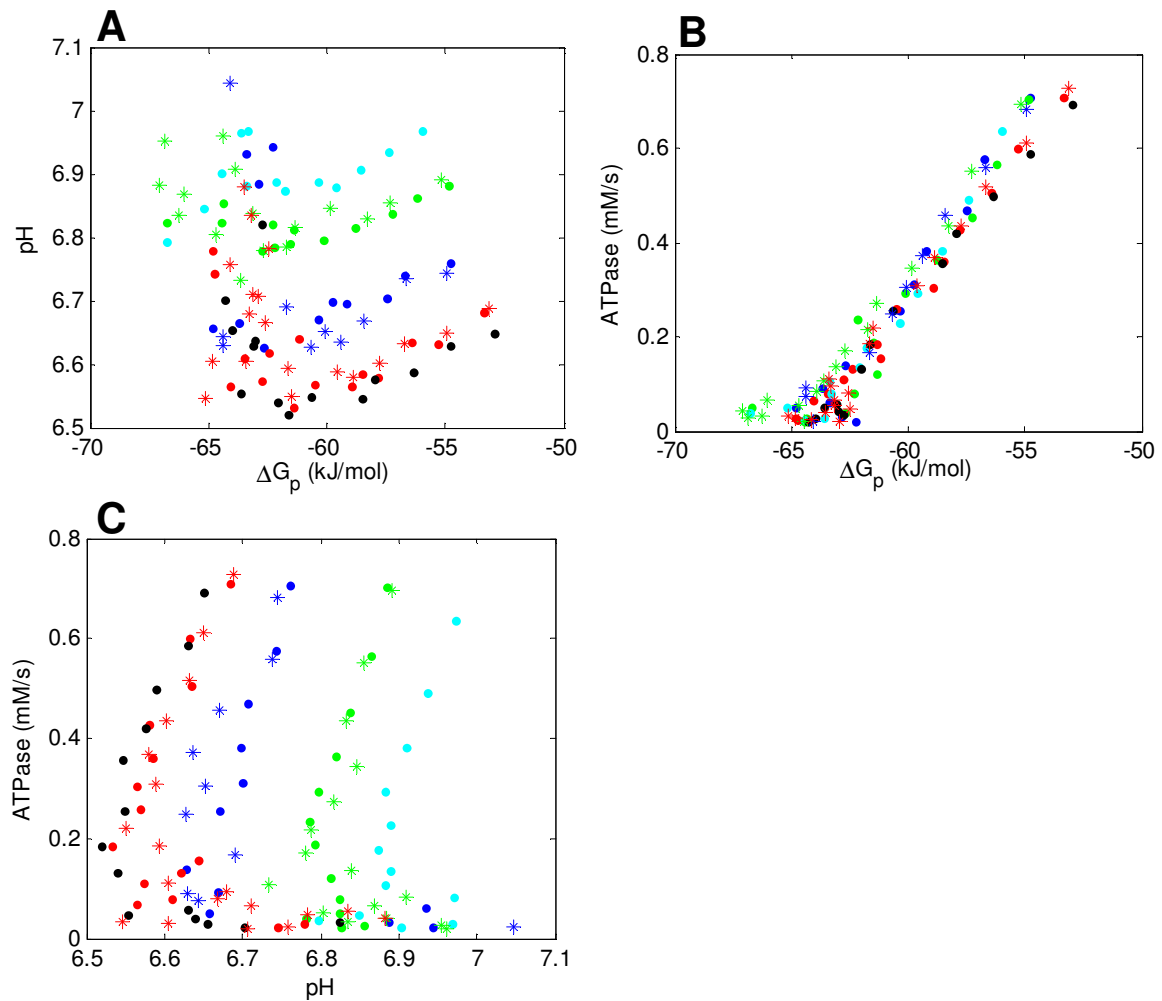

**Figure 1**, effect of variation in end – exercise pH on observed  $\Delta G_p - J_p$  relation. The  $\Delta G_p - \text{pH}$  (A),  $\Delta G_p - J_p$  (B) and  $\text{pH} - J_p$  (C) of different individual datasets are shown. Each dataset is indicated by specific color – marker combination. These results show that between datasets a large variation in cellular pH values was observed (panel A and C) while the  $\Delta G_p - J_p$  relation (B) determined for each dataset was very similar. From these results it was concluded that the  $\Delta G_p - J_p$  relation was insensitive to cellular pH.
