# Supplementary material for: Prediction of Muscle Energy States at Low Metabolic Rates Requires Feedback Control of Mitochondrial Respiratory Chain Activity by Inorganic Phosphate
Source: PubMed Central journal article supplement (PMC3314597; doi:10.1371/journal.pone.0034118), 2012-03-28
Supplement: pone.0034118.s003.pdf [file pone.0034118.s003.pdf]

Figure S3

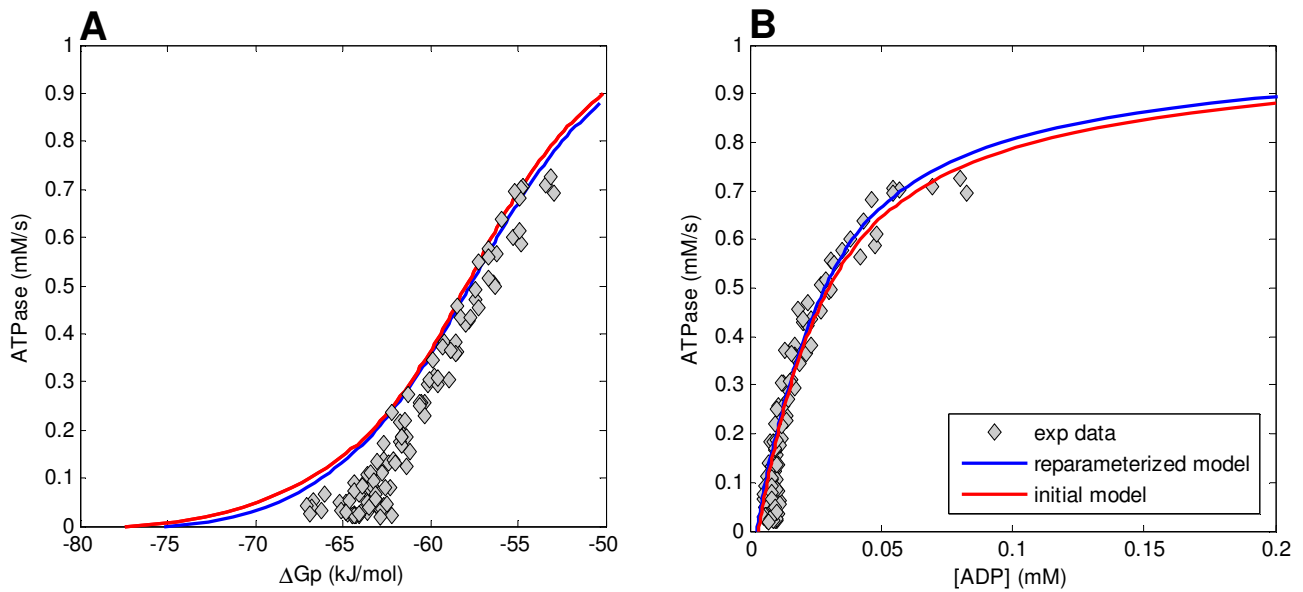

**Figure 3**, predictions according to the initial model (red lines; the same result as the red line in Figure 1 in the main text) and reparameterized model (blue lines) compared to experimental data (grey diamonds) sampling the  $\Delta G_p - J_p$  (A) and ADP -  $J_p$  relation (B). The reparameterized model was obtained by including both the  $\Delta G_p - J_p$  and ADP -  $J_p$  data in the parameter estimation procedure. The transduction function of the reparameterized model became very similar to the initial model and was rejected because it failed to describe rest and low exercise conditions.
