# Supplementary material for: Prediction of Muscle Energy States at Low Metabolic Rates Requires Feedback Control of Mitochondrial Respiratory Chain Activity by Inorganic Phosphate
Source: PubMed Central journal article supplement (PMC3314597; doi:10.1371/journal.pone.0034118), 2012-03-28
Supplement: pone.0034118.s004.pdf [file pone.0034118.s004.pdf]

**Table S1**, adjustable model parameters,

| Parameter name | Description                                      | Value original model   | Value optimized model (Figure 1A) | Parameter range sampled in MC simulations (Figure 1B) | Unit                                                     |
|----------------|--------------------------------------------------|------------------------|-----------------------------------|-------------------------------------------------------|----------------------------------------------------------|
| $R$            | Dehydrogenase parameter                          | 4.559                  | 7.61                              | 0.4559 – 9.118                                        | unitless                                                 |
| $k_{Pi,1}$     | Dehydrogenase parameter                          | 0.1553                 | 0.317                             | 0.01553 – 0.3106                                      | mM                                                       |
| $k_{Pi,2}$     | Dehydrogenase parameter                          | 0.8222                 | 3.70                              | 0.08222 – 1.6444                                      | mM                                                       |
| $X_{DH}$       | Dehydrogenase activity                           | 0.16                   | 0.735                             | 0.016 – 0.32                                          | $\text{mol s}^{-1} \text{M}^{-1} (\text{L mito})^{-1}$   |
| $X_{CI}$       | Complex I activity                               | 4405                   | 14057                             | 440.5 – 8810                                          | $\text{mol s}^{-1} \text{M}^{-2} (\text{L mito})^{-1}$   |
| $X_{C3}$       | Complex III activity                             | 4.887                  | 4.10                              | 0.4887 – 9.774                                        | $\text{mol s}^{-1} \text{M}^{-3/2} (\text{L mito})^{-1}$ |
| $k_{Pi,3}$     | Complex III parameter                            | 0.3601                 | 0.560                             | 0.03601 – 0.7202                                      | mM                                                       |
| $k_{Pi,4}$     | Complex III parameter                            | 5.651                  | 0.334                             | 0.5651 – 11.302                                       | mM                                                       |
| $X_{C4}$       | Complex IV activity                              | $6.766 \times 10^{-5}$ | $10.6 \times 10^{-5}$             | $6.766 \times 10^{-6} - 1.3532 \times 10^{-4}$        | $\text{mol s}^{-1} \text{M}^{-1} (\text{L mito})^{-1}$   |
| $k_{O2}$       | Complex IV parameter                             | 0.12                   | 0.11                              | 0.012 – 0.24                                          | mM                                                       |
| $X_{FI}$       | $F_0F_1$ -ATPase activity                        | 1000.0                 | 699.8                             | 100 – 2000                                            | $\text{mol s}^{-1} \text{M}^{-1} (\text{L mito})^{-1}$   |
| $X_{ANT}$      | ANT activity                                     | 0.041                  | 0.112                             | 0.0041 – 0.082                                        | $\text{mol s}^{-1} (\text{L mito})^{-1}$                 |
| $K_{m,ADP}$    | Michaelis constant ANT                           | $3.5 \times 10^{-3}$   | $13.0 \times 10^{-3}$             | $3.5 \times 10^{-4} - 7.0 \times 10^{-3}$             | mM                                                       |
| $k_{PiHt}$     | $\text{H}^+/\text{Pi}^-$ cotransporter parameter | 0.2542                 | 0.270                             | 0.02542 – 0.5084                                      | mM                                                       |
| $X_{PiHt}$     | $\text{H}^+/\text{Pi}^-$ cotransporter activity  | $3.850 \times 10^{-5}$ | $18.9 \times 10^{-5}$             | $3.850 \times 10^{-6} - 7.7 \times 10^{-5}$           | $\text{mol s}^{-1} \text{M}^{-1} (\text{L mito})^{-1}$   |
| $X_{KH}$       | $\text{K}^+/\text{H}^+$ antiporter activity      | $5.651 \times 10^7$    | $11.9 \times 10^7$                | $5.651 \times 10^6 - 1.1302 \times 10^8$              | $\text{mol s}^{-1} \text{M}^{-2} (\text{L mito})^{-1}$   |

|                           |                                                            |                      |                        |                                            |                                     |
|---------------------------|------------------------------------------------------------|----------------------|------------------------|--------------------------------------------|-------------------------------------|
| $P_{pi}$                  | Mitochondrial membrane permeability to inorganic phosphate | 327                  | 796.5                  | 32.7 – 654                                 | $\mu\text{m s}^{-1}$                |
| $P_A$                     | Mitochondrial outer membrane permeability to nucleotides   | 85.0                 | 117.2                  | 8.5 – 170                                  | $\mu\text{m s}^{-1}$                |
| $C_{\text{tot}}$          | total cytochrom C concentration                            | 2.7                  | 3.97                   | 0.27 – 5.4                                 | $\text{mmol (L IM water)}^{-1}$     |
| $Q_{\text{tot}}$          | total ubiquinol concentration - Q+QH2                      | 1.35                 | 1.26                   | 0.135 – 2.7                                | $\text{mmol (L matrix water)}^{-1}$ |
| $\text{NAD}_{\text{tot}}$ | total matrix NAD(H) concentration - NAD+NADH               | 2.97                 | 2.59                   | 0.297 – 5.94                               | $\text{mmol (L matrix water)}^{-1}$ |
| $X_{\text{buff}}$         | matrix buffering coefficient                               | 100                  | 118.64                 | 10 – 200                                   | $\text{M}^{-1}$                     |
| $K_{\text{DT}}$           | Mg-ATP binding constant                                    | $24 \times 10^{-6}$  | $231.9 \times 10^{-6}$ | $2.4 \times 10^{-6} - 48 \times 10^{-6}$   | M                                   |
| $K_{\text{DD}}$           | Mg-ADP binding constant                                    | $347 \times 10^{-6}$ | $309.1 \times 10^{-6}$ | $34.7 \times 10^{-6} - 694 \times 10^{-6}$ | M                                   |
| gamma                     | mito membrane area per cell volume                         | 5.99                 | 15.1                   | 0.599 – 11.98                              | $\mu\text{m}^{-1}$                  |
| $\theta$                  | ANT parameter                                              | 1                    | 0.960                  | 0 – 1                                      | unitless                            |
| Total matrix ADP+ATP      | Total matrix ADP+ATP                                       | 10                   | 8.66                   | 0.1 – 2                                    | $\text{mmol (L matrix water)}^{-1}$ |

---
