# Supplementary material for: Prediction of Muscle Energy States at Low Metabolic Rates Requires Feedback Control of Mitochondrial Respiratory Chain Activity by Inorganic Phosphate
Source: PubMed Central journal article supplement (PMC3314597; doi:10.1371/journal.pone.0034118), 2012-03-28
Supplement: pone.0034118.s005.pdf [file pone.0034118.s005.pdf]

**Table S2, flux control coefficients, ATPase rate 0.01mM/s**

|                 | DH<br>flux | C1 flux   | C3 flux   | C4 flux   | F1F0<br>flux | ANT<br>flux | Pi H+ cotransp<br>flux | Hleak<br>flux | AMP transp<br>flux | ADP transp<br>flux | ATP<br>transp<br>flux | Pi transp<br>flux | ATP cons.<br>Flux |
|-----------------|------------|-----------|-----------|-----------|--------------|-------------|------------------------|---------------|--------------------|--------------------|-----------------------|-------------------|-------------------|
| <b>X_DH</b>     | 7.88E-04   | 7.88E-04  | 7.88E-04  | 7.88E-04  | 3.91E-09     | -1.61E-12   | 3.75E-12               | 1.66E-03      | -5.64E-03          | 2.82E-06           | 1.41E-06              | -2.98E-11         | -6.69E-06         |
| <b>X_C1</b>     | 6.85E-04   | 6.85E-04  | 6.85E-04  | 6.85E-04  | 1.95E-09     | 3.03E-12    | 8.93E-12               | 1.44E-03      | -5.06E-03          | 2.53E-06           | 1.27E-06              | -5.98E-11         | -6.82E-06         |
| <b>X_C3</b>     | 1.38E-02   | 1.38E-02  | 1.38E-02  | 1.38E-02  | -9.27E-09    | -2.14E-12   | -5.36E-13              | 2.91E-02      | -1.02E-01          | 5.08E-05           | 2.54E-05              | -2.98E-11         | 2.12E-05          |
| <b>X_C4</b>     | 2.05E-03   | 2.05E-03  | 2.05E-03  | 2.05E-03  | 3.91E-09     | -4.82E-12   | -7.14E-13              | 4.31E-03      | -1.51E-02          | 7.55E-06           | 3.77E-06              | -5.98E-11         | -3.94E-06         |
| <b>X_F1F0</b>   | -1.27E-06  | -1.27E-06 | -1.27E-06 | -1.27E-06 | 1.05E-08     | -4.64E-12   | 5.53E-12               | -2.67E-06     | -7.05E-06          | 3.52E-09           | 1.99E-09              | 0.00E+00          | -8.32E-06         |
| <b>X_ANT</b>    | -3.28E-04  | -3.28E-04 | -3.28E-04 | -3.28E-04 | 1.76E-08     | 8.93E-12    | -1.25E-12              | -6.92E-04     | -7.35E-03          | 3.67E-06           | 1.84E-06              | -5.98E-11         | -6.19E-06         |
| <b>X_H+Pi+</b>  | 1.16E-05   | 1.16E-05  | 1.16E-05  | 1.16E-05  | 1.56E-08     | 3.57E-12    | 9.64E-12               | 2.46E-05      | -2.08E-03          | 1.04E-06           | 5.21E-07              | -2.98E-11         | -7.72E-06         |
| <b>X_Hle</b>    | 4.67E-01   | 4.67E-01  | 4.67E-01  | 4.67E-01  | 3.91E-08     | 4.46E-12    | 1.39E-11               | 9.83E-01      | 6.09E-02           | -3.05E-05          | -1.52E-05             | -5.98E-11         | -2.60E-05         |
| <b>mito Adn</b> | -7.95E-04  | -7.95E-04 | -7.95E-04 | -7.95E-04 | 2.93E-08     | 2.50E-12    | 6.96E-12               | -1.68E-03     | 4.89E-02           | -2.45E-05          | -1.22E-05             | -2.98E-11         | -2.88E-06         |
| <b>mito Pi</b>  | -8.97E-07  | -8.97E-07 | -8.97E-07 | -8.97E-07 | 3.27E-08     | 3.57E-13    | 1.02E-11               | -1.89E-06     | -4.79E-05          | 2.40E-08           | 1.24E-08              | -4.61E-11         | -8.31E-06         |
| <b>X_AtC</b>    | 5.19E-01   | 5.19E-01  | 5.19E-01  | 5.19E-01  | 1.00E+00     | 1.00E+00    | 1.00E+00               | -1.69E-02     | 1.02E+00           | 1.00E+00           | 1.00E+00              | 1.00E+00          | 1.00E+00          |
| <b>sum</b>      | 1.00       | 1.00      | 1.00      | 1.00      | 1.00         | 1.00        | 1.00                   | 1.00          | 1.01               | 1.00               | 1.00                  | 1.00              | 1.00              |
