# Supplementary material for: Prediction of Muscle Energy States at Low Metabolic Rates Requires Feedback Control of Mitochondrial Respiratory Chain Activity by Inorganic Phosphate
Source: PubMed Central journal article supplement (PMC3314597; doi:10.1371/journal.pone.0034118), 2012-03-28
Supplement: pone.0034118.s007.pdf [file pone.0034118.s007.pdf]

**Table S4, Range of parameter values explored in Monte Carlo simulation approach.** This parameter range was explored for the model of regulation by substrate feedback (model configuration *i*).

| <b>Parameter name</b>   | <b>Parameter range</b> | <b>Unit</b>                                                  |
|-------------------------|------------------------|--------------------------------------------------------------|
| <i>X<sub>CIII</sub></i> | 0 – 100                | mol s <sup>-1</sup> M <sup>-3/2</sup> (L mito) <sup>-1</sup> |
| <i>nH</i>               | 0 – 10                 | Unitless                                                     |
| <i>K<sub>50Pi</sub></i> | 0 – 30                 | mM                                                           |
