# Supplementary material for: Prediction of Muscle Energy States at Low Metabolic Rates Requires Feedback Control of Mitochondrial Respiratory Chain Activity by Inorganic Phosphate
Source: PubMed Central journal article supplement (PMC3314597; doi:10.1371/journal.pone.0034118), 2012-03-28
Supplement: pone.0034118.s008.pdf [file pone.0034118.s008.pdf]

**Table S5.** Range of parameter values explored in Monte Carlo simulation approach. This parameter range was explored for the model of regulation by parallel activation (model configuration *ii*).

| <b>Parameter name</b> | <b>Parameter range</b> | <b>Unit</b>                                       |
|-----------------------|------------------------|---------------------------------------------------|
| $X_A$                 | 0 -10                  | Unitless                                          |
| $X_{IA}$              | 0 – 1                  | Unitless                                          |
| $nH$                  | 1 – 4                  | Unitless                                          |
| $K_{50ArC}$           | 0 – 0.1                | mmol (L cell water) <sup>-1</sup> s <sup>-1</sup> |
| $K_{on}$              | 0 – 1                  | s <sup>-1</sup>                                   |
| $K'_{off}$            | 0 – 1000               | s <sup>-1</sup>                                   |
