# Supplementary material for: Prediction of Muscle Energy States at Low Metabolic Rates Requires Feedback Control of Mitochondrial Respiratory Chain Activity by Inorganic Phosphate
Source: PubMed Central journal article supplement (PMC3314597; doi:10.1371/journal.pone.0034118), 2012-03-28
Supplement: pone.0034118.s009.pdf [file pone.0034118.s009.pdf]

**Table S6**, parameter settings for the simulations of post exercise recovery dynamics (Figure 6)

*Control dataset*

| <b>Model configuration</b>                  | <b>Parameter name</b>                                   |                                          |                            |                                                        |                                                 |                                                       |
|---------------------------------------------|---------------------------------------------------------|------------------------------------------|----------------------------|--------------------------------------------------------|-------------------------------------------------|-------------------------------------------------------|
|                                             | ATPase demand flux (mmol (L cell water) <sup>-1</sup> ) | Mitochondrial volume (mL mito / mL cell) | End exercise pH (unitless) | Cr <sub>tot</sub> (mmol (L cell water) <sup>-1</sup> ) | Pi initial (mmol (L cell water) <sup>-1</sup> ) | $\lambda$ (mM s <sup>-1</sup> pH unit <sup>-1</sup> ) |
| Original model                              | 0.90                                                    | 0.056                                    | 6.65                       | 41.2                                                   | 4.0                                             | 0.33                                                  |
| Model configuration 1 (substrate feedback)  | 0.90                                                    | 0.056                                    | 6.65                       | 41.2                                                   | 4.0                                             | 0.33                                                  |
| Model configuration 2 (parallel activation) | 0.90                                                    | 0.056                                    | 6.65                       | 41.2                                                   | 4.0                                             | 0.12                                                  |

*Athlete dataset*

| <b>Model configuration</b>                  | <b>Parameter name</b>                                   |                                          |                            |                                                        |                                                 |                                                       |
|---------------------------------------------|---------------------------------------------------------|------------------------------------------|----------------------------|--------------------------------------------------------|-------------------------------------------------|-------------------------------------------------------|
|                                             | ATPase demand flux (mmol (L cell water) <sup>-1</sup> ) | Mitochondrial volume (mL mito / mL cell) | End exercise pH (unitless) | Cr <sub>tot</sub> (mmol (L cell water) <sup>-1</sup> ) | Pi initial (mmol (L cell water) <sup>-1</sup> ) | $\lambda$ (mM s <sup>-1</sup> pH unit <sup>-1</sup> ) |
| Original model                              | 1.1                                                     | 0.085                                    | 6.95                       | 38.2                                                   | 4.0                                             | 1.33                                                  |
| Model configuration 1 (substrate feedback)  | 1.1                                                     | 0.085                                    | 6.95                       | 38.2                                                   | 4.0                                             | 1.33                                                  |
| Model configuration 2 (parallel activation) | 1.1                                                     | 0.080                                    | 6.95                       | 38.2                                                   | 4.0                                             | 1.33                                                  |

*Subject with sedentary lifestyle dataset*

| <b>Model configuration</b> | <b>Parameter name</b> |  |  |  |  |  |
|----------------------------|-----------------------|--|--|--|--|--|
|----------------------------|-----------------------|--|--|--|--|--|

|                                             | ATPase demand flux (mmol (L cell water) <sup>-1</sup> ) | Mitochondrial volume (mL mito / mL cell) | End exercise pH (unitless) | Cr <sub>tot</sub> (mmol (L cell water) <sup>-1</sup> ) | Pi initial (mmol (L cell water) <sup>-1</sup> ) | $\lambda$ (mM s <sup>-1</sup> pH unit <sup>-1</sup> ) |
|---------------------------------------------|---------------------------------------------------------|------------------------------------------|----------------------------|--------------------------------------------------------|-------------------------------------------------|-------------------------------------------------------|
| Original model                              | 0.35                                                    | 0.0235                                   | 6.70                       | 47.0                                                   | 4.0                                             | 0.1                                                   |
| Model configuration 1 (substrate feedback)  | 0.35                                                    | 0.0235                                   | 6.70                       | 47.0                                                   | 4.0                                             | 0.1                                                   |
| Model configuration 2 (parallel activation) | 0.42                                                    | 0.030                                    | 6.70                       | 47.0                                                   | 4.0                                             | 0.017                                                 |
