# Supplementary material for: Prediction of Muscle Energy States at Low Metabolic Rates Requires Feedback Control of Mitochondrial Respiratory Chain Activity by Inorganic Phosphate
Source: PLoS One. 2012 Mar 28;7(3):e34118. doi: 10.1371/journal.pone.0034118 (PMC3314597; doi:10.1371/journal.pone.0034118)
Supplement: Table S3 — Concentration control coefficients. (PDF) [file pone.0034118.s006.pdf]

**Table S3, concentration control coefficients, ATPase rate 0.01mM/s**

[illegible]

continued ...

[illegible]
